# Supplementary material for: Effect of High-Temperature Stress on Plant Physiological Traits and Mycorrhizal Symbiosis in Maize Plants
Source: MDPI journal article supplement (doi:10.3390/jof7100867), 2021-10-16
Supplement: s1 [file s1]

## Supplementary Materials

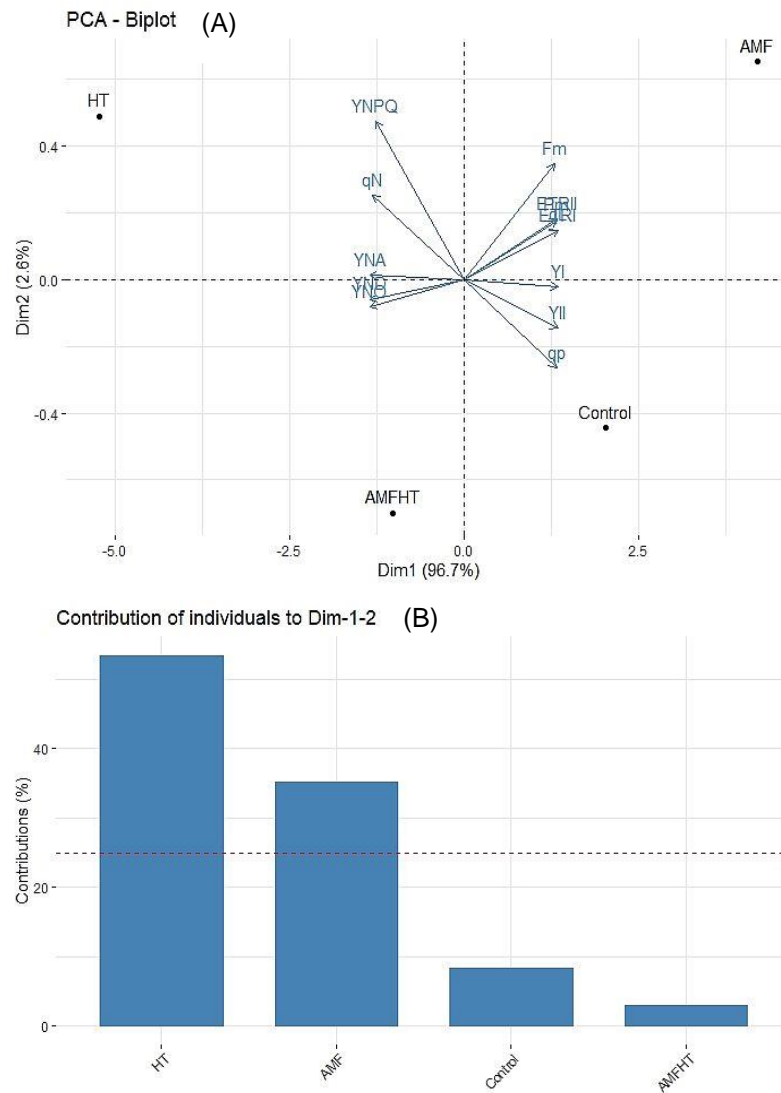

**Figure S1(A)** PCA score plot for the treatments and physiological parameters. The percent values that indicate the variation contributed by each PC is displayed by parenthesis. The highest contribution was made by the parameters present in the right (Supplementary Table S2). **(B)** Graphical illustration of individual contribution of the treatments to PCs. Control = maize plants grown in normal soil. AMF = maize plants grown in AMF enriched soil, HT = maize plants grown in normal soil under higher temperature (natural temperature during summer 43 °C). AMF+HT = maize plants grown in AMF enriched soil under high temperature stress. Pm= Response of maximal change in P700, F<sub>m</sub>= maximum fluorescence, ETR<sub>I</sub>= relative electron transport rates in PSI, ETR<sub>II</sub>=PSII with the application of a saturation pulse, qp= photochemical quenching, qn= non-photochemical quenching coefficient, qL= fraction of open PSII reaction centres, Y(I)= quantum yield of PSI, Y(II)= quantum yield of PSII, Y(NA)= quantum yield of non-photochemical energy dissipation due to acceptor-side limitation, Y(ND)= quantum yield of non-photochemical energy dissipation due to donor-side limitation, Y(NO)= yield of non-regulated energy dissipation, Y(NPQ)= yield of regulated energy dissipation.

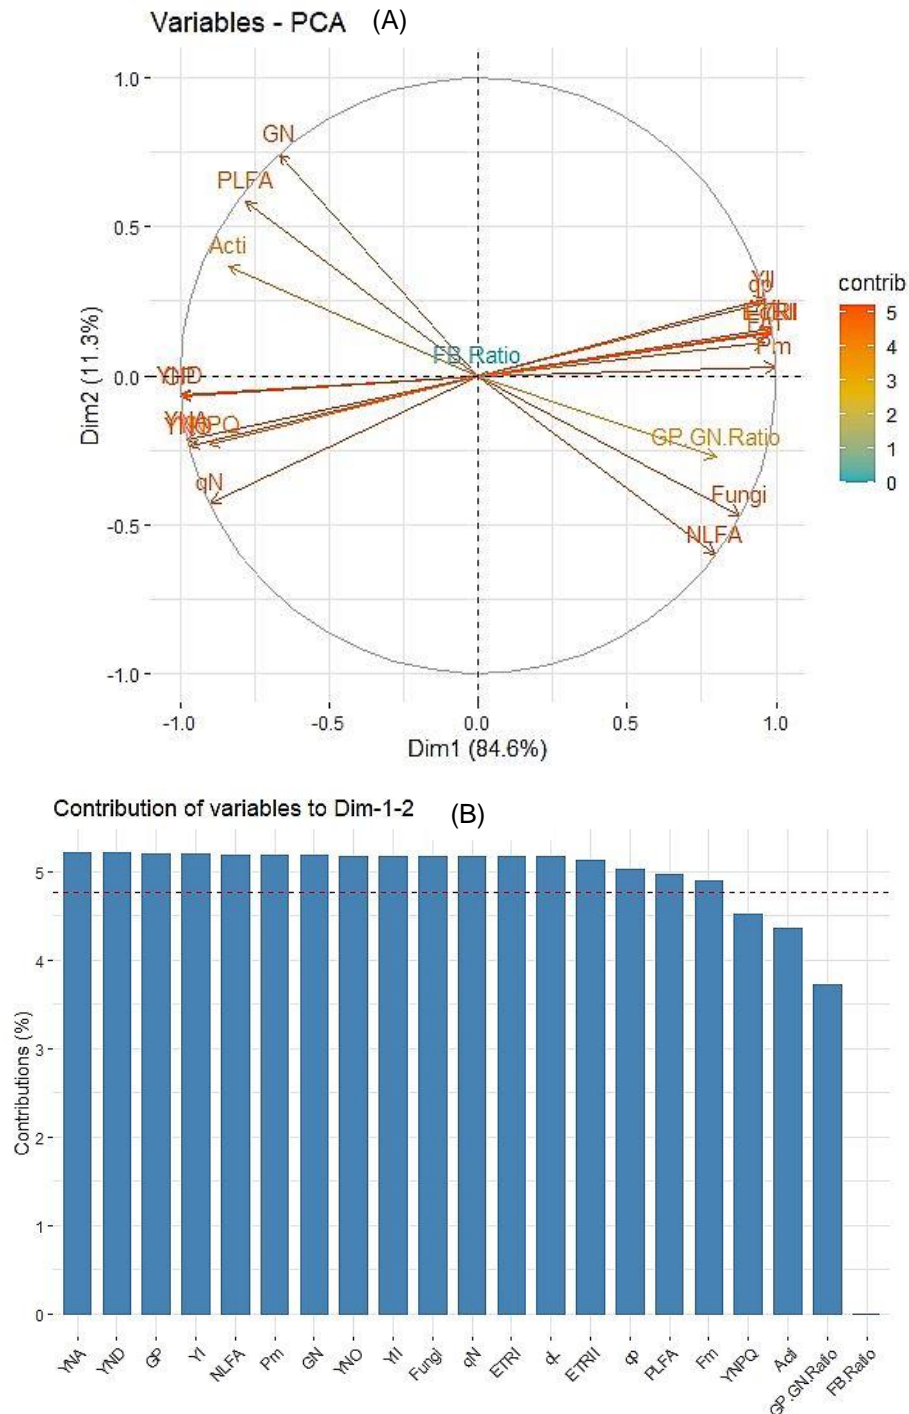

**Figure S2(A)** PCA score plot for the physiological parameters and signature lipids. The percent values that indicate the variation contributed by each PC is displayed by parenthesis. The highest contribution was made by the parameters present in the right (Supplementary Table S3). **(B)** Graphical illustration of individual contribution of the physiological parameters and signature lipids to PCs. Pm= Response of maximal change in P700, F<sub>m</sub>= maximum fluorescence, ETR<sub>I</sub>= relative electron transport rates in PSI, ETR<sub>II</sub>=PSII with the application of a saturation pulse, qp= photochemical quenching, qn= non-photochemical quenching coefficient, qL= fraction of open PSII reaction centres, Y(I)= quantum yield of PSI, Y(II)= quantum yield of PSII, Y(NA)= quantum yield of non-photochemical energy dissipation due to acceptor-side limitation, Y(ND)= quantum yield of non-photochemical energy dissipation due to donor-side limitation, Y(NO)= yield of non-regulated energy dissipation, Y(NPQ)= yield of regulated energy dissipation, fungi= fungal biomass, AM= PLFA = 16:1 $\omega$ 5cis (AM signature fatty acid biomarker for hyphal biomass), NLFA= 16:1 $\omega$ 5cis neutral lipid fatty acid (AM signature fatty acid biomarker for storage lipids), GN= Gram-negative bacteria, GP GN ratio= Gram-positive/Gram-negative ratio, Acti= actinomycetes, GP= Gram-positive, FB ratio= Fungi/Bacteria ratio.

**Table S1**

Eigen values, variance and variable coordinates of different signature lipids and AM associated microscopic variables assessed in the soil corresponding to Figure 4A (Principle component analysis score plot) PCA loadings  $N > 0.5$  are shown in bold.

| <b>Factors</b>              | <b>PC1</b>  | <b>PC2</b>  | <b>PC3</b> |
|-----------------------------|-------------|-------------|------------|
| Eigen value                 | 8.91        | 0.69        | 0.41       |
| % Total variance            | 89.08       | 6.90        | 4.02       |
| % Cumulative variance       | 89.08       | 95.98       | 100        |
| Variable coordinates        |             |             |            |
| Spore density               | <b>1.00</b> | -0.05       | 0.06       |
| Root colonization (RC)      | <b>0.98</b> | -0.13       | 0.11       |
| 16:1 $\omega$ 5cis PLFA     | -0.98       | 0.19        | 0.05       |
| 16:1 $\omega$ 5cis NLFA     | 0.99        | 0.01        | 0.14       |
| Gram negative               | -0.96       | 0.22        | -0.19      |
| Gram positive               | -0.81       | -0.44       | 0.38       |
| Fungi                       | <b>0.99</b> | 0.14        | 0.04       |
| Actinomycetes               | -0.92       | 0.19        | 0.34       |
| Fungi/bacteria ratio        | 0.00        | 0.00        | 0.00       |
| Gram negative/Gram positive | <b>0.80</b> | <b>0.54</b> | 0.25       |

**Table S2**

Eigen values, variance and variable coordinates of different physiological variables assessed in plants corresponding to Figure S1A (Principle component analysis score plot) PCA loadings  $N > 0.5$  are shown in bold.

| <b>Factors</b>        | <b>PC1</b>   | <b>PC2</b> | <b>PC3</b> |
|-----------------------|--------------|------------|------------|
| Eigen value           | 12.58        | 0.34       | 0.08       |
| % Total variance      | 96.75        | 2.60       | 0.65       |
| % Cumulative variance | 96.75        | 99.35      | 100        |
| Variable coordinates  |              |            |            |
| YII                   | <b>0.99</b>  | -0.11      | -0.03      |
| YNO                   | -0.99        | -0.06      | 0.08       |
| YNPQ                  | -0.93        | 0.35       | -0.10      |
| YI                    | <b>1.00</b>  | -0.02      | 0.04       |
| YNA                   | -1.00        | 0.01       | 0.03       |
| YND                   | -0.99        | -0.04      | -0.12      |
| ETRI                  | <b>0.99</b>  | 0.11       | 0.00       |
| ETRII                 | <b>0.99</b>  | 0.13       | -0.02      |
| Pm                    | <b>0.98</b>  | 0.13       | 0.11       |
| Fm                    | <b>0.97</b>  | 0.26       | -0.04      |
| qL                    | <b>0.99</b>  | 0.11       | -0.01      |
| qp                    | <b>0.98</b>  | -0.19      | 0.03       |
| qN                    | <b>-0.96</b> | 0.19       | 0.19       |

**Table S3**

Eigen values, variance and variable coordinates of different physiological variables and signature lipids assessed in plants corresponding to Figure S2A (Principle component analysis score plot).

| <b>Factors</b>              | <b>PC1</b>  | <b>PC2</b>  | <b>PC3</b> |
|-----------------------------|-------------|-------------|------------|
| Eigen value                 | 16.92       | 2.26        | 0.81       |
| % Total variance            | 84.61       | 11.32       | 4.07       |
| % Cumulative variance       | 84.61       | 95.93       | 100.00     |
| <b>Variable coordinates</b> |             |             |            |
| 16:1 $\omega$ 5cis PLFA     | -0.78       | <b>0.59</b> | 0.22       |
| 16:1 $\omega$ 5cis NLFA     | <b>0.80</b> | -0.60       | 0.07       |
| Gram negative               | -0.67       | <b>0.74</b> | 0.07       |
| Gram positive               | -1.00       | -0.07       | -0.04      |
| Fungi                       | <b>0.88</b> | -0.47       | 0.09       |
| Actinomycetes               | -0.84       | 0.37        | 0.41       |
| Fungi/bacteria ratio        | 0.00        | 0.00        | 0.00       |
| Gram negative/Gram positive | <b>0.80</b> | -0.28       | 0.54       |
| YII                         | <b>0.96</b> | 0.26        | -0.09      |
| YNO                         | -0.97       | -0.24       | -0.09      |
| YNPQ                        | -0.90       | -0.23       | 0.36       |
| YI                          | <b>0.99</b> | 0.16        | -0.04      |
| YNA                         | -0.98       | -0.22       | 0.00       |
| YND                         | -1.00       | -0.07       | 0.01       |
| ETRI                        | <b>0.98</b> | 0.15        | 0.10       |
| ETRII                       | <b>0.98</b> | 0.15        | 0.13       |
| Pm                          | <b>1.00</b> | 0.03        | 0.07       |
| Fm                          | <b>0.96</b> | 0.11        | 0.25       |
| qL                          | <b>0.98</b> | 0.15        | 0.10       |
| qp                          | <b>0.95</b> | 0.24        | -0.19      |
| qN                          | -0.90       | -0.43       | 0.10       |
